# Supplementary material for: The impact of the COVID-19 pandemic on the incidence and mortality of zoonotic diseases in China
Source: PubMed Central journal article supplement — BMJ Glob Health. 2022 Jan 7;7(1):e007109. doi: 10.1136/bmjgh-2021-007109 (PMC8743839; doi:10.1136/bmjgh-2021-007109), 2022-01-07
Supplement: bmjgh-2021-007109supp001.pdf [file bmjgh-2021-007109supp001.pdf]

## Supplementary materials

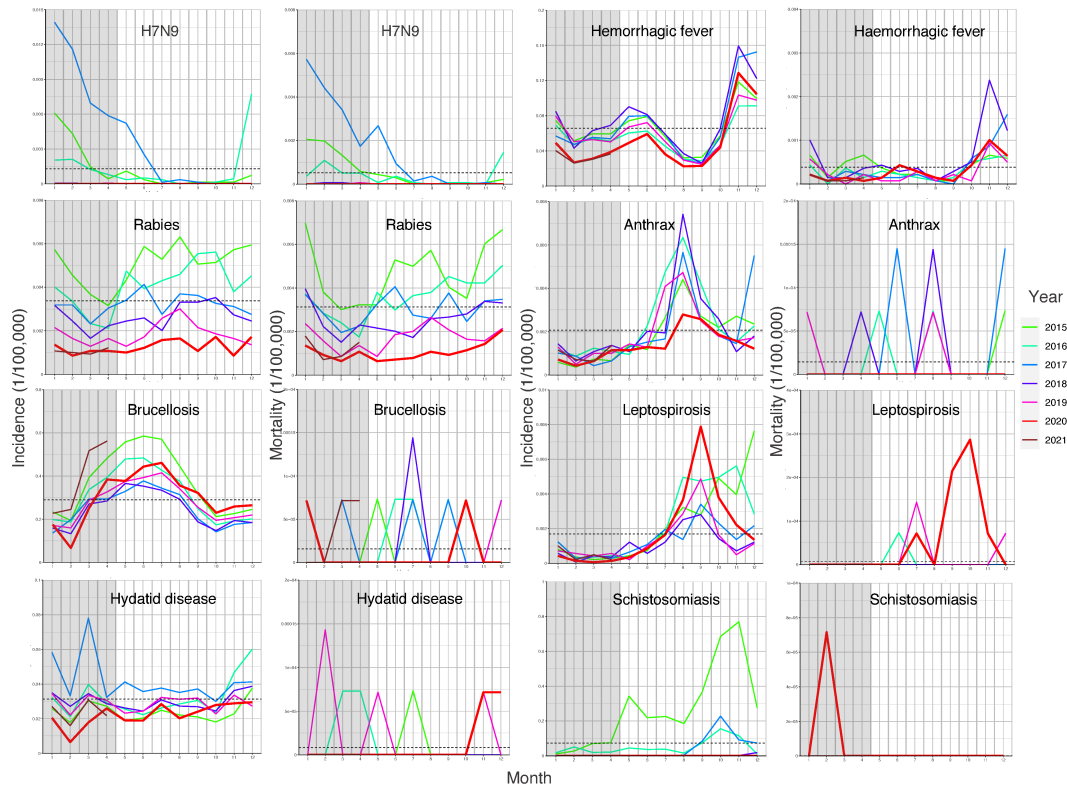

**Figure S1.** Trends of the monthly incidence and the monthly mortality of each zoonotic diseases in China from 2015 to April 2021.

Notes: The horizontal dotted line represents the average monthly incidence and mortality across 2015 and 2019.

**Table S1.** Start and end times of public health emergency response mechanisms in each province.

| <b>Province</b>       | <b>Public health emergency response level 1</b> | <b>Public health emergency response level 2</b> | <b>Public health emergency response level 3</b> | <b>Public health emergency response level 4</b> |
|-----------------------|-------------------------------------------------|-------------------------------------------------|-------------------------------------------------|-------------------------------------------------|
| <b>Beijing</b>        | January 24                                      | April 30                                        |                                                 |                                                 |
| <b>Tianjin</b>        | January 24                                      | April 30                                        |                                                 |                                                 |
| <b>Hebei</b>          | January 24                                      | April 30                                        |                                                 |                                                 |
| <b>Shanxi</b>         | January 25                                      | February 24                                     | March 10                                        |                                                 |
| <b>Inner-Mongolia</b> | January 25                                      |                                                 | February 25                                     |                                                 |
| <b>Liaoning</b>       | January 25                                      |                                                 | February 22                                     |                                                 |
| <b>Jilin</b>          | January 25                                      | February 26                                     | March 20                                        |                                                 |
| <b>Heilongjiang</b>   | January 25                                      | March 4                                         | March 25                                        |                                                 |
| <b>Shanghai</b>       | January 24                                      | March 24                                        |                                                 |                                                 |
| <b>Jiangsu</b>        | January 24                                      | February 24                                     | March 27                                        |                                                 |
| <b>Zhejiang</b>       | January 23                                      | March 2                                         | March 23                                        |                                                 |
| <b>Anhui</b>          | January 24                                      | February 25                                     | March 15                                        |                                                 |
| <b>Fujian</b>         | January 24                                      | February 26                                     | February 26                                     |                                                 |
| <b>Jiangxi</b>        | January 24                                      | March 12                                        | March 20                                        |                                                 |
| <b>Shandong</b>       | January 24                                      | March 7                                         | May 5                                           |                                                 |
| <b>Henan</b>          | January 25                                      | March 19                                        | May 5                                           |                                                 |
| <b>Hubei</b>          | January 24                                      | May 2                                           |                                                 |                                                 |
| <b>Hunan</b>          | January 23                                      | March 10                                        | March 31                                        |                                                 |
| <b>Guangdong</b>      | January 23                                      | February 24                                     |                                                 |                                                 |
| <b>Guangxi</b>        | January 24                                      |                                                 | February 24                                     |                                                 |
| <b>Hainan</b>         | January 25                                      | January 24                                      | February 26                                     |                                                 |
| <b>Chongqing</b>      | January 24                                      | March 10                                        | March 24                                        |                                                 |
| <b>Sichuan</b>        | January 24                                      | February 26                                     | March 25                                        |                                                 |
| <b>Guizhou</b>        | January 24                                      |                                                 | February 23                                     |                                                 |
| <b>Yunnan</b>         | January 24                                      |                                                 | February 24                                     |                                                 |
| <b>Xizang</b>         | January 30                                      | March 6                                         |                                                 |                                                 |
| <b>Shaanxi</b>        | January 25                                      |                                                 | February 28                                     |                                                 |
| <b>Gansu</b>          | January 25                                      |                                                 | February 21                                     |                                                 |
| <b>Qinghai</b>        | January 25                                      |                                                 | February 26                                     | March 6                                         |
| <b>Ningxia</b>        | January 25                                      | February 28                                     |                                                 |                                                 |
| <b>Xinjiang</b>       | January 25                                      | February 25                                     | March 7                                         | March 21                                        |

**Table S2.** Summary of the annual incidence and mortality of zoonotic diseases

|                           | Average annual incidence |           | Growth rate(%) | p- value | Average annual mortality |           | Growth rate(%) | p- value |
|---------------------------|--------------------------|-----------|----------------|----------|--------------------------|-----------|----------------|----------|
|                           | 2020                     | 2015-2019 |                |          | 2020                     | 2015-2019 |                |          |
| <b>Total</b>              | 4.5273                   | 5.6132    | -19.34         | <0.001   | 0.01769                  | 0.04897   | -63.88         | <0.001   |
| <b>H7N9</b>               | 0.0000                   | 0.0156    | -100.00        | <0.001   | 0.00000                  | 0.00635   | -100.00        | <0.001   |
| <b>Haemorrhagic fever</b> | 0.6119                   | 0.7874    | -22.28         | <0.001   | 0.00365                  | 0.00461   | -20.78         | 0.20     |
| <b>Rabies</b>             | 0.0152                   | 0.0404    | -62.38         | <0.001   | 0.01282                  | 0.03743   | -65.75         | <0.001   |
| <b>Anthrax</b>            | 0.0166                   | 0.0248    | -33.06         | <0.001   | 0.00000                  | 0.00017   | -100.00        | 0.16     |
| <b>Brucellosis</b>        | 3.5885                   | 3.4750    | 3.27           | <0.001   | 0.00014                  | 0.00019   | -24.00         | 0.65     |
| <b>Leptospirosis</b>      | 0.0226                   | 0.0203    | 11.07          | 0.20     | 0.00064                  | 0.00009   | 640.98         | 0.01     |
| <b>Hydatid disease</b>    | 0.2677                   | 0.3764    | -28.88         | <0.001   | 0.00014                  | 0.00010   | 41.14          | 0.57     |
| <b>Schistosomiasis</b>    | 0.0048                   | 0.8734    | -99.45         | <0.001   | 0.00007                  | 0.00000   | --             | --       |

**Table S3.** Observed and predicted annual mortality of zoonotic diseases in 2020, China

|                           | Incidence |           |                |         | Morality |           |                |         |
|---------------------------|-----------|-----------|----------------|---------|----------|-----------|----------------|---------|
|                           | Observed  | Predicted | Growth rate(%) | p-value | Observed | Predicted | Growth rate(%) | p-value |
| <b>Total</b>              | 4.5273    | 4.5687    | -0.90          | 0.11    | 0.01747  | 0.02529   | -30.91         | <0.001  |
| <b>H7N9</b>               | 0.0000    | 0.0023    | -100.00        | <0.001  | 0.00000  | 0.00107   | -100.00        | <0.001  |
| <b>Haemorrhagic fever</b> | 0.6119    | 0.6319    | -3.16          | 0.03    | 0.00365  | 0.00425   | -14.13         | 0.44    |
| <b>Rabies</b>             | 0.0152    | 0.0190    | -20.25         | 0.01    | 0.01282  | 0.02066   | -37.97         | <0.001  |
| <b>Anthrax</b>            | 0.0166    | 0.0244    | -32.00         | <0.001  | 0.00000  | 0.00017   | -100.00        | 0.16    |
| <b>Brucellosis</b>        | 3.5885    | 3.4934    | 2.72           | <0.001  | 0.00014  | 0.00019   | -23.53         | 0.65    |
| <b>Leptospirosis</b>      | 0.0226    | 0.0210    | 7.39           | 0.37    | 0.00064  | 0.00009   | 644.37         | 0.01    |
| <b>Hydatid disease</b>    | 0.2677    | 0.2714    | -1.35          | 0.55    | 0.00014  | 0.00010   | 39.96          | 0.56    |
| <b>Schistosomiasis</b>    | 0.0048    | 0.0970    | -95.05         | <0.001  | 0.00007  | 0.00007   | 0.00           | 0.99    |

**Table S4.** Measures under China public health emergency response system

|                  |                                                                                                                                                                                                                                                                                                                                                                                                                                                                                                                                                                                                                                                                                                                                                                                                                                                                                                                                                                                                                                                                                                                                                                                                                                                                                                                                                                                                                                                                                                                                                                                                                                                                                                                                                                                                                                                                                                |
|------------------|------------------------------------------------------------------------------------------------------------------------------------------------------------------------------------------------------------------------------------------------------------------------------------------------------------------------------------------------------------------------------------------------------------------------------------------------------------------------------------------------------------------------------------------------------------------------------------------------------------------------------------------------------------------------------------------------------------------------------------------------------------------------------------------------------------------------------------------------------------------------------------------------------------------------------------------------------------------------------------------------------------------------------------------------------------------------------------------------------------------------------------------------------------------------------------------------------------------------------------------------------------------------------------------------------------------------------------------------------------------------------------------------------------------------------------------------------------------------------------------------------------------------------------------------------------------------------------------------------------------------------------------------------------------------------------------------------------------------------------------------------------------------------------------------------------------------------------------------------------------------------------------------|
| <b>Level I</b>   | Where the State Council initiates level I emergency response, it shall organize and coordinate emergency response under the unified leadership and command of the national emergency command organization. If the State Council fails to initiate level I emergency response, the provincial government shall initiate level I emergency response at the provincial level according to the event level and the actual situation, and report to the State Council for the record. According to the nature of the incident, carry out emergency response under the unified leadership and command of the provincial leading group, and request the support of the State Council and relevant ministries and commissions of the State Council if necessary. (1) Provincial government emergency response. The provincial leading group shall be established, with the governor as the group leader, and the office shall be located in the general office of the provincial government. Establish working groups such as control group, medical group, public opinion group, medical material support group, living material support group and comprehensive group, and increase corresponding special working classes as needed to carry out emergency disposal, medical treatment, technical support support support, communication and transportation support, material and equipment supply support, information release, publicity and education, scientific research, domestic and foreign exchanges and cooperation Logistics support, supervision and inspection, etc. (2) Emergency response of municipal and county (city and district) governments. Under the unified leadership and command of the provincial leading group, the municipal and county (city and district) governments are responsible for carrying out the emergency disposal work in their respective jurisdictions. |
| <b>Level II</b>  | Level II emergency response (1) emergency response of provincial government. A provincial leading group is established, with the executive vice governor as the group leader, and the office is located in the general office of the provincial government. Establish working groups such as control group, medical group, public opinion group, medical material support group, living material support group and comprehensive group, implement special class operation and division of responsibilities, and carry out emergency disposal, medical treatment, technical support support support, communication and transportation support, material and equipment supply support, information release, publicity and education, scientific research, domestic and foreign exchanges and cooperation, logistics support Supervision and inspection. (2) Emergency response of municipal and county (city and district) governments. Under the unified leadership and command of the provincial leading group, the municipal and county (city and district) governments are responsible for carrying out the emergency disposal work in their respective jurisdictions.                                                                                                                                                                                                                                                                                                                                                                                                                                                                                                                                                                                                                                                                                                                       |
| <b>Level III</b> | Level III emergency response (1) emergency response of provincial government. A provincial leading group shall be established, headed by the vice governor in charge of health and health work. The office shall be located in the provincial department in charge of health and health, and in the general office of the provincial government under special circumstances. Establish relevant working groups as required, implement special shift operation and division of responsibilities, and coordinate the health emergency disposal of the whole province or specific regions. (2) Emergency response of relevant municipal and county (city, district) governments. Under the unified leadership and command of the provincial leading group, the relevant municipal and county (city and district) governments are responsible for carrying out the emergency disposal work under their jurisdiction.                                                                                                                                                                                                                                                                                                                                                                                                                                                                                                                                                                                                                                                                                                                                                                                                                                                                                                                                                                               |
| <b>Level IV</b>  | Level IV emergency response (1) emergency response of provincial government. Led by the provincial health department, organize relevant departments to start the joint prevention and control                                                                                                                                                                                                                                                                                                                                                                                                                                                                                                                                                                                                                                                                                                                                                                                                                                                                                                                                                                                                                                                                                                                                                                                                                                                                                                                                                                                                                                                                                                                                                                                                                                                                                                  |

|  |                                                                                                                                                                                                                                                                                                                                                                                                                                                                                                                                                                                                                                                                                                                                                                                                                                                                                       |
|--|---------------------------------------------------------------------------------------------------------------------------------------------------------------------------------------------------------------------------------------------------------------------------------------------------------------------------------------------------------------------------------------------------------------------------------------------------------------------------------------------------------------------------------------------------------------------------------------------------------------------------------------------------------------------------------------------------------------------------------------------------------------------------------------------------------------------------------------------------------------------------------------|
|  | <p>mechanism to carry out prevention and control. (2) Emergency response of relevant municipal and county (city, district) governments. Under the unified coordination of the provincial joint prevention and control mechanism, the relevant municipal and county (city and district) governments are responsible for carrying out the emergency disposal work within their jurisdiction. All cities and counties (cities and districts) shall initiate regional emergency response measures with reference to the above contents. After the provincial emergency response is launched, the municipal and county (city and district) governments of the place where the incident occurred shall improve the emergency response level of the region as appropriate, strengthen work measures, strictly prevent the spread of the incident and control the impact of the incident.</p> |
|--|---------------------------------------------------------------------------------------------------------------------------------------------------------------------------------------------------------------------------------------------------------------------------------------------------------------------------------------------------------------------------------------------------------------------------------------------------------------------------------------------------------------------------------------------------------------------------------------------------------------------------------------------------------------------------------------------------------------------------------------------------------------------------------------------------------------------------------------------------------------------------------------|

Notes: See "Regulations on Emergency Response to Public Health Emergencies" promulgated by the State Council of the People's Republic of China ([http://www.gov.cn/gongbao/content/2011/content\\_1860801.htm](http://www.gov.cn/gongbao/content/2011/content_1860801.htm)).
